# Supplementary material for: Hepatitis D infection induces IFN-β-mediated NK cell activation and TRAIL-dependent cytotoxicity
Source: PubMed Central journal article supplement (PMC10739304; doi:10.3389/fimmu.2023.1287367), 2023-12-08
Supplement: DataSheet_1.pdf [file DataSheet_1.pdf]

## *Supplementary Material*

### 1. Supplementary tables

**Supplementary table 1: Commercial antibodies used for flow cytometry**

| Antigen    | Fluorophore   | Clone     | Company     | Cat.:      | Isotype        |
|------------|---------------|-----------|-------------|------------|----------------|
| B7H6       | PE            | 875001    | R&D Systems | FAB7144P   | Mouse IgG1, κ  |
| CD3        | APC           | UCHT1     | Biologend   | 300458     | Mouse IgG1, κ  |
| CD3        | BV786         | UCHT1     | BD          | 565491     | Mouse IgG1, κ  |
| CD3        | FITC          | UCHT1     | BD          | 300440     | Mouse IgG1, κ  |
| CD3        | AlexaFluor594 | UCHT1     | BioLegend   | 300446     | Mouse IgG1, κ  |
| CD4        | PerCP         | SK3       | BD          | 345770     | Mouse IgG1, κ  |
| CD4        | PE            | RPA-T4    | Biologend   | 300507     | Mouse IgG1, κ  |
| CD8a       | PE-Cy7        | SK1       | Biologend   | 344712     | Mouse IgG1, κ  |
| CD8a       | APC           | SK1       | Biologend   | 980904     | Mouse IgG1, κ  |
| CD14       | APC-eF780     | 61D3      | eBioscience | 47-0149-42 | Mouse IgG1, κ  |
| CD16       | PerCP-Cy5.5   | 3G8       | Biologend   | 302028     | Mouse IgG1, κ  |
| CD16       | V500          | 3G8       | BD          | 561394     | Mouse IgG1, κ  |
| CD19       | APC-eF780     | HiB19     | eBioscience | 47-0199    | Mouse IgG1, κ  |
| CD25       | BV650         | BC96      | Biologend   | 302633     | Mouse IgG1, κ  |
| CD54       | PE            | HCD54     | Biologend   | 322708     | Mouse IgG1, κ  |
| CD56       | BV605         | 5.1H11    | Biologend   | 362538     | Mouse IgG1, κ  |
| CD56       | PE-Cy7        | HCD56     | Biologend   | 318318     | Mouse IgG1, κ  |
| CD56       | BV650         | 5.1H11    | Biologend   | 362532     | Mouse IgG1, κ  |
| CD69       | BV421         | FN50      | Biologend   | 310929     | Mouse IgG1, κ  |
| CD69       | BV711         | FN50      | BD          | 563836     | Mouse IgG1, κ  |
| CD69       | BV395         | FN50      | BD          | 564364     | Mouse IgG1, κ  |
| CD107a     | FITC          | H4A3      | Biologend   | 328606     | Mouse IgG1, κ  |
| CD112      | PE-Cy7        | TX31      | Biologend   | 337413     | Mouse IgG1, κ  |
| DNAM-1     | FITC          | 11A8      | Biologend   | 338303     | Mouse IgG1, κ  |
| CD155      | PE            | SKIL.4    | Biologend   | 337609     | Mouse IgG1, κ  |
| FasL       | BV421         | NOK-1     | Biologend   | 306411     | Mouse IgG1, κ  |
| Galectin-9 | PE-Cy7        | 9M1-3     | Biologend   | 348915     | Mouse IgG1, κ  |
| Granzyme B | Pacific Blue  | GB11      | Biologend   | 515408     | Mouse IgG1, κ  |
| HLA-A/B/C  | BV605         | W6/32     | Biologend   | 311431     | Mouse gG2a, κ  |
| HLA-E      | PE            | 3D12      | Biologend   | 373203     | Mouse IgG1, κ  |
| HLA-F      | PE            | 3D11      | Biologend   | 373203     | Mouse IgG1, κ  |
| HVEM       | PE            | I22       | Biologend   | 318805     | Mouse IgG1, κ  |
| IFN-g      | APC           | B27       | BD          | 554702     | Mouse IgG1, κ  |
| IFN-g      | BV605         | 4S.B3     | Biologend   | 502535     | Mouse IgG1, κ  |
| IFN-g      | PE            | B27       | Biologend   | 506507     | Mouse IgG1, κ  |
| Ki-67      | PE            | Ki-67     | Biologend   | 350504     | Mouse IgG1, κ  |
| Ki-67      | BV421         | Ki-67     | Biologend   | 350506     | Mouse IgG1, κ  |
| MICA/B     | PE            | 6D4       | Biologend   | 320906     | Mouse IgG2b, κ |
| NKp30      | BV605         | P30-15    | BD          | 563384     | Mouse IgG1, κ  |
| NKp46      | APC           | 9E2/Nkp46 | BD          | 558051     | Mouse IgG1, κ  |
| NKG2C      | PE            | FAB138P   | R&D Systems | 134591     | Mouse IgG1, κ  |
| NKG2D      | BV605         | 1D11      | Biologend   | 320831     | Mouse IgG1, κ  |
| OX40L      | PE            | 11C3.1    | Biologend   | 326308     | Mouse IgG1, κ  |
| PD-1       | BV421         | NAT105    | Biologend   | 367421     | Mouse IgG1, κ  |
| PD-1       | FITC          | MIH43     | eBioscience | 11-9969-41 | Mouse IgG1, κ  |
| PD-1       | PerCP-Cy5.5   | EH12      | BD          | 561273     | Mouse IgG1, κ  |
| PD-L1      | PE            | MIH1      | BD          | 557924     | Mouse IgG1, κ  |
| PD-L1      | PE-Cy7        | 29E.2A3   | Biologend   | 329717     | Mouse IgG2b, κ |
| PD-L1      | PE-CF594      | MIH1      | BD          | 563742     | Mouse IgG1, κ  |

|          |             |              |              |             |                |
|----------|-------------|--------------|--------------|-------------|----------------|
| Perforin | PE          | B-D48        | Biologend    | 353304      | Mouse IgG1, κ  |
| pSTAT2   | FITC        | polyclonal   | ThermoFisher | PA5-46888   | Rabbit / IgG   |
| Tim-3    | PerCP-Cy5.5 | F38-2E2      | Biologend    | 345015      | Mouse IgG1, κ  |
| Tim-3    | BV421       | F38-2E2      | Biologend    | 345002      | Mouse IgG1, κ  |
| TNF-R1   | APC         | W15099A      | Biologend    | 369905      | Mouse IgG2a, κ |
| TRAIL    | APC         | RIK-2        | Biologend    | 308209      | Mouse IgG1, κ  |
| TRAIL    | PE-Cy7      | RIK-2        | Biologend    | 308216      | Mouse IgG1, κ  |
| TRAIL    | PE          | RIK-2        | Biologend    | 308206      | Mouse IgG1, κ  |
| TRAIL    | PE          | RIK-2        | BD           | 550516      | Mouse IgG1, κ  |
| TRAIL-R1 | PE-Cy7      | DJR1         | Biologend    | 307209      | Mouse IgG1, κ  |
| TRAIL-R1 | APC         | DJR1         | Biologend    | 307207      | Mouse IgG1, κ  |
| TRAIL-R2 | PE          | DJR2-4 (7-8) | Biologend    | 307405      | Mouse IgG1, κ  |
| TRAIL-R3 | APC         | DJR3         | Miltenyi     | 130-104-788 | Mouse IgG1, κ  |
| TRAIL-R4 | FITC        | TRAIL-R4-01  | ThermoFisher | A15752      | Mouse IgG1, κ  |

### Supplementary table 2: Antibodies used as isotype controls

| Fluorophore  | Clone      | Company      | Cat.:      | Isotype        |
|--------------|------------|--------------|------------|----------------|
| APC          | MOPC-21    | Biologend    | 400120     | Mouse IgG1, κ  |
| PE-Cy7       | MOPC-21    | Biologend    | 400126     | Mouse IgG1, κ  |
| PE           | MOPC-21    | Biologend    | 400112     | Mouse IgG1, κ  |
| BV605        | X40        | BD           | 562652     | Mouse IgG1, κ  |
| Pacific Blue | MOPC-21    | Biologend    | 400131     | Mouse IgG1, κ  |
| PE-Cy7       | MPC-11     | Biologend    | 400325     | Mouse IgG2b, κ |
| PE-CF594     | X40        | BD           | 562292     | Mouse IgG1, κ  |
| BV421        | MOPC-21    | Biologend    | 400158     | Mouse IgG1, κ  |
| FITC         | MOPC-21    | Biologend    | 554679     | Mouse IgG1, κ  |
| PerCP-Cy5.5  | MOPC-21    | Biologend    | 400150     | Mouse IgG1, κ  |
| BV711        | MOPC-21    | Biologend    | 400168     | Mouse IgG1, κ  |
| BV786        | X40        | BD           | 563330     | Mouse IgG1, κ  |
| PerCP        | MOPC-21    | Biologend    | 400147     | Mouse IgG1, κ  |
| BV650        | MOPC-21    | BD           | 400163     | Mouse IgG1, κ  |
| PE           | MOPC-173   | Biologend    | 400214     | Mouse IgG2a, κ |
| BV605        | MOPC-173   | Biologend    | 400269     | Mouse IgG2a, κ |
| APC          | MOPC-173   | Biologend    | 400221     | Mouse IgG2a, κ |
| FITC         | polyclonal | ThermoFisher | 11-4614-80 | Rabbit / IgG   |

### Supplementary table 3: Recombinant human chimera proteins

|               | Company     | Cat.:   | Isotype    |
|---------------|-------------|---------|------------|
| NKp30-Fc      | R&D Systems | 1849-NK | human IgG1 |
| NKp44-Fc      | R&D Systems | 2249-NK | human IgG1 |
| Human IgG1-Fc | R&D Systems | 110-HG  | human IgG1 |

### Supplementary table 4: Secondary antibodies

| Antigen         | Fluorophore | Clone      | Company                | Cat.:       |
|-----------------|-------------|------------|------------------------|-------------|
| Human IgG (H+L) | PE          | Polyclonal | Jackson ImmunoResearch | 109-116-170 |

**Supplementary table 5: Healthy donors**

| Gender | Age         | CMV status |
|--------|-------------|------------|
| f      | 28          | +          |
| f      | 26          | +          |
| f      | 27          | +          |
| f      | 82          | +          |
| f      | 24          | +          |
| f      | 31          | +          |
| m      | 23          | +          |
| f      | 22          | +          |
| m      | 33          | +          |
| f      | 27          | +          |
| f      | 28          | +          |
| f      | 25          | +          |
| f      | 29          | +          |
| f      | 25          | +          |
| f      | 45          | +          |
| m      | 54          | +          |
| m      | 27          | +          |
| m      | 34          | +          |
| f      | 31          | -          |
| f      | 26          | -          |
| f      | 21          | -          |
| f      | 25          | -          |
| f      | 26          | -          |
| f      | 29          | -          |
| m      | 20          | -          |
| m      | 25          | -          |
| m      | 23          | -          |
| f      | 22          | -          |
| f      | 28          | -          |
|        | 31.3 (Mean) |            |

**Supplementary table 6: cHBV/cHDV patient cohort**

| Diagnose            | Gender | HBV-PCR [IU/ml] | Anti-HDAg IgG | HDV-PCR [IU/ml] | Therapy                            | Age         | GOT [U/l] | GPT [U/l] | HBeAg | clinical phase                           | CMV status |
|---------------------|--------|-----------------|---------------|-----------------|------------------------------------|-------------|-----------|-----------|-------|------------------------------------------|------------|
| cHBV/cHDV/rH AV/Com | f      | <10             | +             | 688002          | Viread (since 2017)                | 32          | 67        | 133       | -     | HBeAg- chronic hepatitis B               | +          |
| cHBV / cHDV         | f      | <10             | +             | 18762           | naive, low viral load, low ALT/AST | 37          | 33        | 36        | -     | HBeAg- chronic HBV infection             | +          |
| cHBV/cHDV           | f      | 14052           | +             | 100000          | Nuc                                | 51          | 63        | 58        | +     | HBeAg+/(NUC-related) chronic hepatitis B | +          |
| cHBV/cHDV           | m      | 453             | +             | 316000          | naive                              | 38          | 43        | 36        | n.a.  | n.a.                                     | +          |
| cHBV/cHDV           | m      | 110             | +             | 107627          | status post PEG-IFN                | 34          | 142       | 324       | n.a.  | n.a.                                     | +          |
|                     |        |                 |               |                 |                                    | 38.4 (Mean) |           |           |       |                                          |            |

**Supplementary table 7: cHBV/cHDV (resolved) patient cohort**

| Diagnose         | Gender | HBV-PCR [IU/ml] | Anti-HDAg IgG | HDV-PCR [IU/ml] | Therapy                            | Age         | GOT [U/l] | GPT [U/l] | HBeAg | clinical phase                           | CMV status |
|------------------|--------|-----------------|---------------|-----------------|------------------------------------|-------------|-----------|-----------|-------|------------------------------------------|------------|
| cHBV/rHDV        | f      | 350             | +             | 0               | naive, low viral load, low ALT/AST | 33          | 23        | 23        | -     | HBeAg- chronic HBV infection             | +          |
| cHBV/rHDV        | f      | 134             | +             | 0               | naive                              | 43          | 22        | 26        | n.a.  | n.a.                                     | +          |
| cHBV/rHDV        | f      | 80              | +             | 0               | naive, low viral load, low ALT/AST | 28          | 59        | 84        | -     | HBeAg- chronic HBV infection             | +          |
| trHBV/trHDV      | m      | 0               | +             | 0               | Entecavir                          | 60          | 24        | 29        | +     | HBeAg+/(NUC-related) chronic hepatitis B | +          |
| trHBV/trHDV      | m      | 0               | +             | 0               | status post PEG-IFN                | 38          | 20        | 13        | n.a.  | n.a.                                     | +          |
| trHBV/rHCV/trHDV | m      | 0               | +             | 0               | status post PEG-IFN                | 51          | 39        | 34        | -     | HBeAg- chronic hepatitis B               | +          |
| cHBV/rHCV/rHDV   | m      | 6593            | +             | 0               | naive                              | 37          | n.a.      | 38        | n.a.  | n.a.                                     | +          |
| cHBV/rHDV        | m      | 10              | +             | 0               | naive, low viral load, low ALT/AST | 53          | 22        | 22        | -     | HBeAg- chronic HBV infection             | -          |
| cHBV/trHDV       | m      | 10              | +             | 0               | Tenofovir (since 2014)             | 29          | 74        | 84        | +     | HBeAg+/(NUC-related) chronic hepatitis B | -          |
|                  |        |                 |               |                 |                                    | 41.3 (Mean) |           |           |       |                                          |            |

**Supplementary table 8: cHBV patient cohort for TRAIL and CD69 analysis**

| Diagnose | Gender | HBV-PCR [IU/ml] | Therapy                | Age         | GOT [U/l] | GPT [U/l] | HBeAg+ | clinic phase                             | CMV status |
|----------|--------|-----------------|------------------------|-------------|-----------|-----------|--------|------------------------------------------|------------|
| cHBV     | m      | 0               | Entecavir (since 2009) | 37          | 21        | 36        | -      | HBeAg- chronic hepatitis B               | +          |
| cHBV     | m      | 24              | Entecavir (since 2016) | 39          | 32        | 31        | +      | HBeAg+/(NUC-related) chronic hepatitis B | +          |
| cHBV     | f      | 0               | Entecavir (since 2007) | 67          | 31        | 20        | +      | HBeAg+/(NUC-related) chronic hepatitis B | n.a.       |
| cHBV     | m      | 0               | Entecavir (since 2007) | 59          | 32        | 39        | -      | HBeAg- chronic hepatitis B               | +          |
| cHBV     | m      | 21              | Tenofovir (since 2010) | 39          | 28        | 47        | n.a.   | n.a.                                     | +          |
| cHBV     | m      | 0               | Entecavir (since 2013) | 28          | 18        | 31        | -      | HBeAg- chronic hepatitis B               | +          |
| cHBV     | m      | 0               | Entecavir (since 2018) | 37          | 34        | 32        | +      | HBeAg+/(NUC-related) chronic hepatitis B | +          |
| cHBV     | f      | 265614098       | Entecavir (since 2009) | 33          | 53        | 123       | +      | HBeAg+/(NUC-related) chronic hepatitis B | +          |
| cHBV     | m      | 345             | Entecavir (since 2019) | 25          | 37        | 25        | -      | HBeAg- chronic hepatitis B               | +          |
| cHBV     | m      | 0               | Viread (since 2014)    | 61          | 22        | 19        | -      | HBeAg- chronic hepatitis B               | +          |
| cHBV     | f      | 2243            | naive                  | 37          | 17        | 15        | +      | HBeAg+/(NUC-related) chronic hepatitis B | +          |
| cHBV     | f      | 110             | naive                  | 35          | 18        | 25        | -      | HBeAg- chronic hepatitis B               | -          |
|          |        |                 |                        | 41.4 (Mean) |           |           |        |                                          |            |

**Supplementary table 9: cHBV/cHDV patient cohort for TRAIL and CD69 analysis**

| Diagnose  | Gender | HBV-PCR [IU/ml] | Anti-HDAg IgG | HDV-PCR [IU/ml] | Therapy | Age         | GOT [U/l] | GPT [U/l] | HBeAg+ | clinic phase                             | CMV status |
|-----------|--------|-----------------|---------------|-----------------|---------|-------------|-----------|-----------|--------|------------------------------------------|------------|
| cHBV/cHDV | m      | 22486           | yes           | 24607           | naive   | 59          | 54        | 63        | neg    | HBeAg- chronic hepatitis B               | n.a.       |
| cHBV/cHDV | f      | 14052           | yes           | 100000          | Nuc     | 51          | 63        | 58        | pos    | HBeAg+/(NUC-related) chronic hepatitis B | +          |
| cHBV/cHDV | m      | <10             | yes           | 457980          | naive   | 46          | 26        | 35        | neg    | HBeAg- chronic hepatitis B               | n.a.       |
| cHBV/cHDV | m      | <10             | yes           | 457980          | naive   | 41          | 90        | 110       | n.a.   | n.a.                                     | n.a.       |
|           |        |                 |               |                 |         | 49.3 (Mean) |           |           |        |                                          |            |

## 2. Supplementary figures

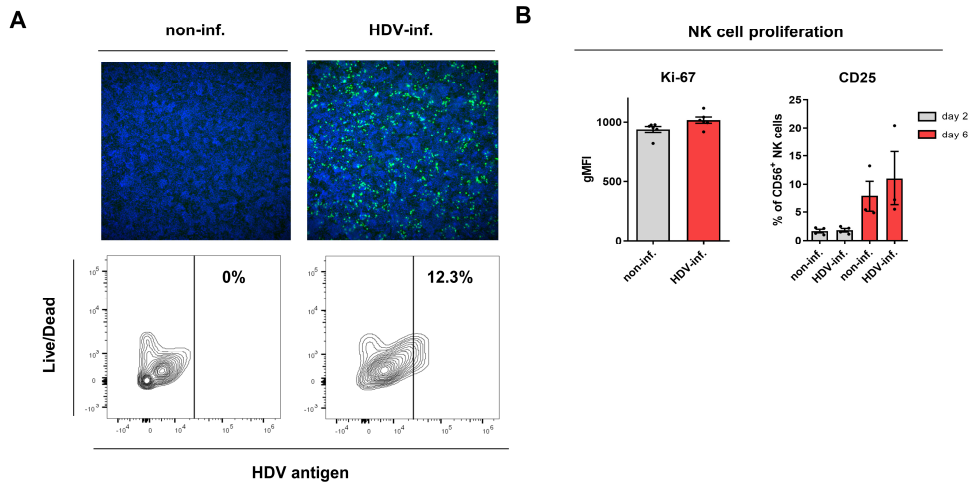

**Supplementary Fig. 1. (A)** Intracellular expression of the HDV antigen by HepG2-hNTCP cells determined by flow cytometry and immunofluorescence staining (blue: nuclei; green: HDVAg<sup>+</sup> cells) 7 days post-infection. **(B)** Intracellular expression of Ki-67 (n=6) and surface expression of CD25 (n=3) on healthy donor NK cells in co-culture with non-infected or HDV-infected HepG2-hNTCP cells after 2 days or 2 and 6 days of co-culture, respectively (bars represent the mean geometric fluorescence intensity or mean frequency of positive cells +/- SEM).

## HepG2-hNTCP/ NK cell co-culture

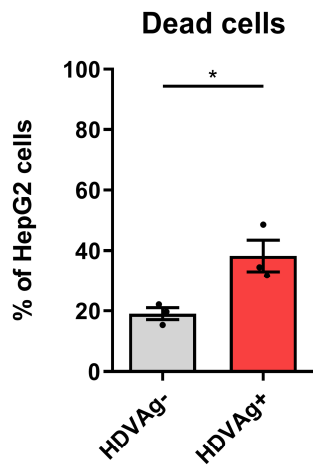

**Supplementary Fig. 2.** Frequency of dead (fixable viability dye<sup>+</sup>) HDV-infected HepG2-hNTCP cells in co-culture with NK cells after 48 h (n=3). Data was stratified based on the intracellular expression of HDVAg for analysis (bars represent the mean frequency of positive cells +/- SEM). Levels of significance: \*p<0.05 (student's t-test).

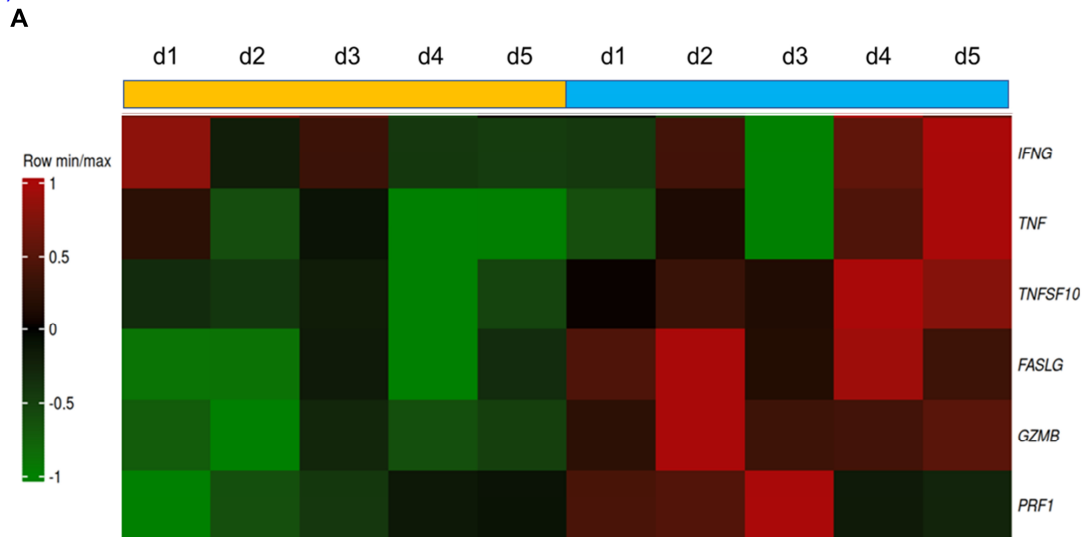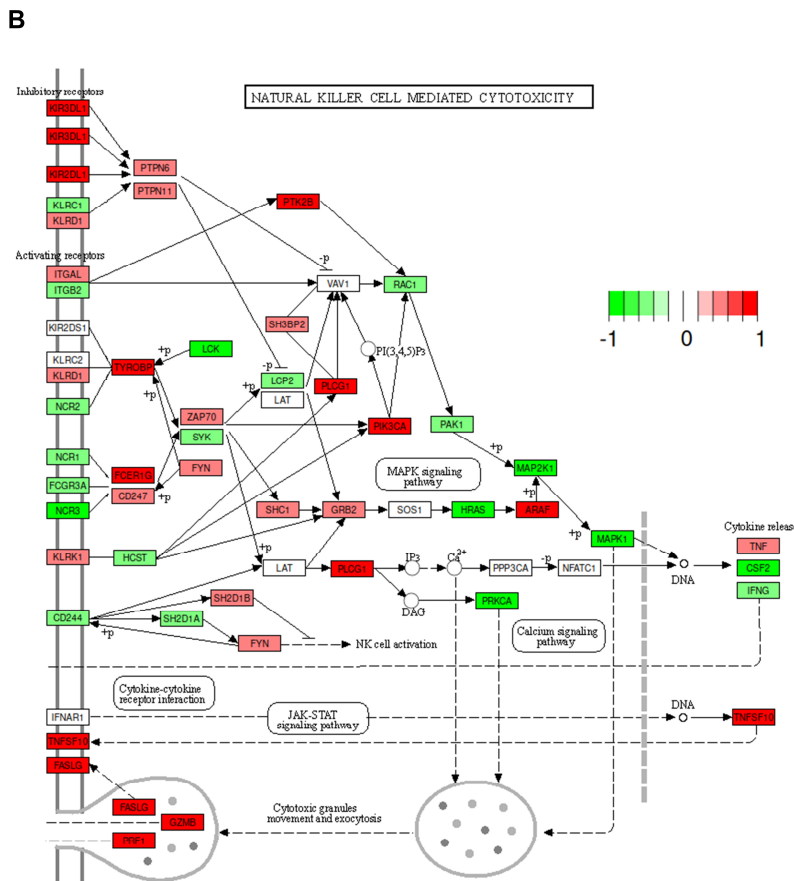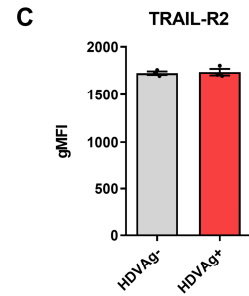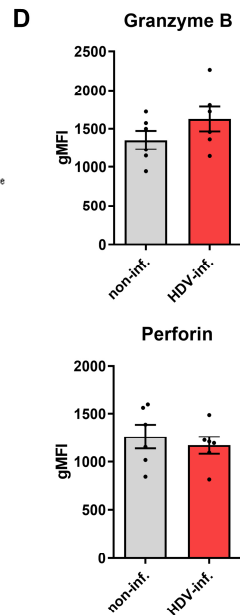

**Supplementary Fig. 3. (A)** Heatmap showing the expression of the cytotoxicity-associated genes IFN- $\gamma$ , TNF- $\alpha$ , TNFSF10 (TRAIL), FASLG, GZMB (granzyme B), and PRF1 (perforin) by peripheral NK cells from healthy donors in co-culture with non-infected (yellow) or HDV-infected (blue) HepG2-hNTCP cells (d: donor) (n=5). **(B)** KEGG-based pathway analysis of NK cell cytotoxicity in co-culture with HDV-infected HepG2-hNTCP cells (n=5). Upregulation of genes is displayed in red, down-regulated genes are shown in green. **(C)** Expression of TRAIL-R2 by HDV-infected HepG2-hNTCP cells (n=3) 7 days after infection. Data was stratified based on the intracellular expression of HDVAg for analysis (bars represent the mean geometric fluorescence intensity of positive cells  $\pm$  SEM). **(D)** Intracellular expression of perforin and granzyme B (n=6) after 2 days of co-culture with non-infected or HDV-infected HepG2-hNTCP cells (bars represent the geometric mean of the fluorescence intensity of positive cells  $\pm$  SEM).

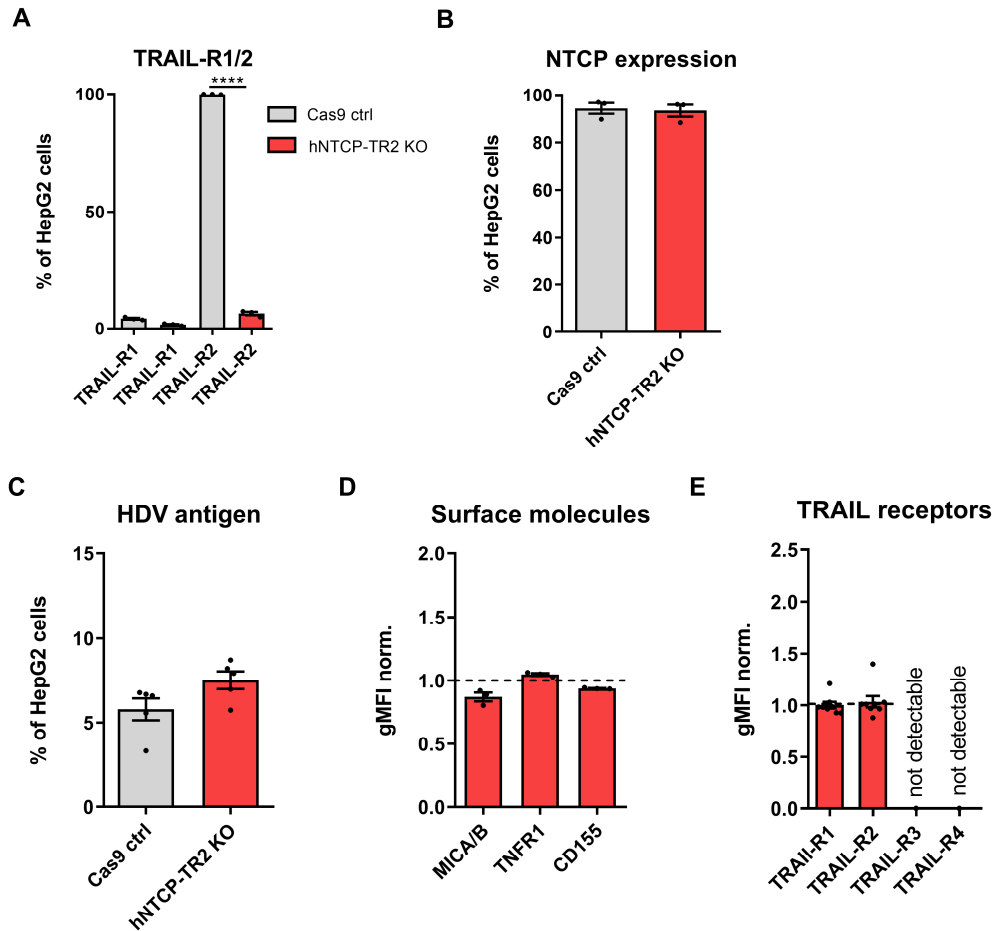

**Supplementary Fig. 4.** (A) Surface expression of TRAIL-R1 and 2 by HepG2-hNTCP Cas9 ctrl or TRAIL-R2 KO HepG2-hNTCP cells (hNTCP-TR2 KO) (n=3) (bars represent the mean frequency of positive cells +/- SEM). (B) Surface expression of hNTCP by HDV-infected Cas9 ctrl or TRAIL-R2 KO HepG2-hNTCP cells (hNTCP-TR2 KO) (n=3) (bars represent the mean frequency of positive cells +/- SEM). (C) Intracellular expression of the HDV antigen by HDV-infected Cas9 ctrl or TRAIL-R2 KO HepG2-hNTCP cells (hNTCP-TR2 KO) (n=5) (bars represent the mean frequency of positive cells +/- SEM). (D) Surface expression of MICA/B, TNFR1 and CD155 by TRAIL-R2 KO HepG2-hNTCP cells (n=3) (bars represent the geometric mean fluorescence intensity normalized to the mean of HepG2-hNTCP Cas9 ctrl cells +/- SEM). (E) Surface expression of TRAIL-R1;2;3;4 on HDV-infected HepG2-hNTCP cells (n=8) (bars represent the geometric mean fluorescence intensity normalized to the mean of non-infected cells +/- SEM). Levels of significance: \*\*\*\*p<0.0001 (student's t-test).



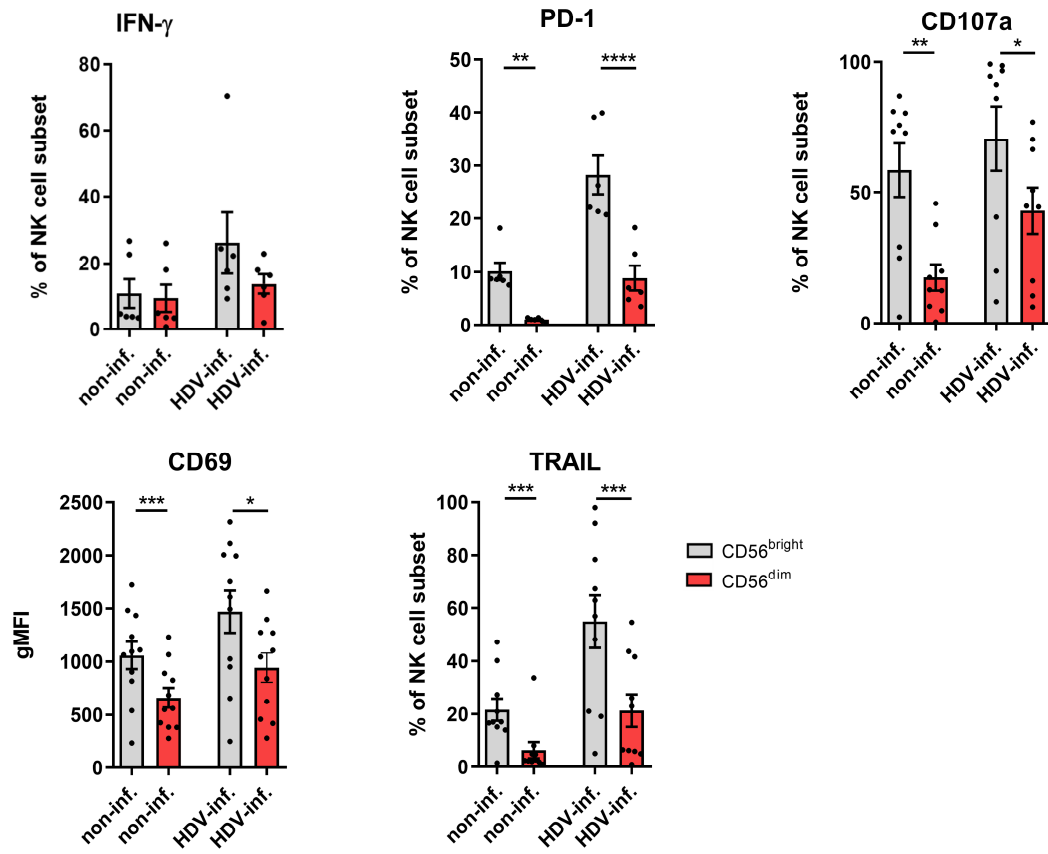

**Supplementary Fig. 5.** Intracellular expression of IFN- $\gamma$  (n=6) and surface expression of PD-1 (n=6), CD107a (n=9), CD69 (n=11) or TRAIL (n=10) on NK cells after 2 days of co-culture with non-infected or HDV-infected HepG2-hNTCP cells. NK cells are stratified based on the expression of CD56 on NK cells into CD56<sup>bright</sup> and CD56<sup>dim</sup> NK cells for analysis (n=10) (bars represent the geometric mean fluorescence intensity or mean frequency of positive cells +/- SEM). Levels of significance: \*p<0.05, \*\*p<0.01, \*\*\*p<0.001, \*\*\*\*p<0.0001 (student's t-test).

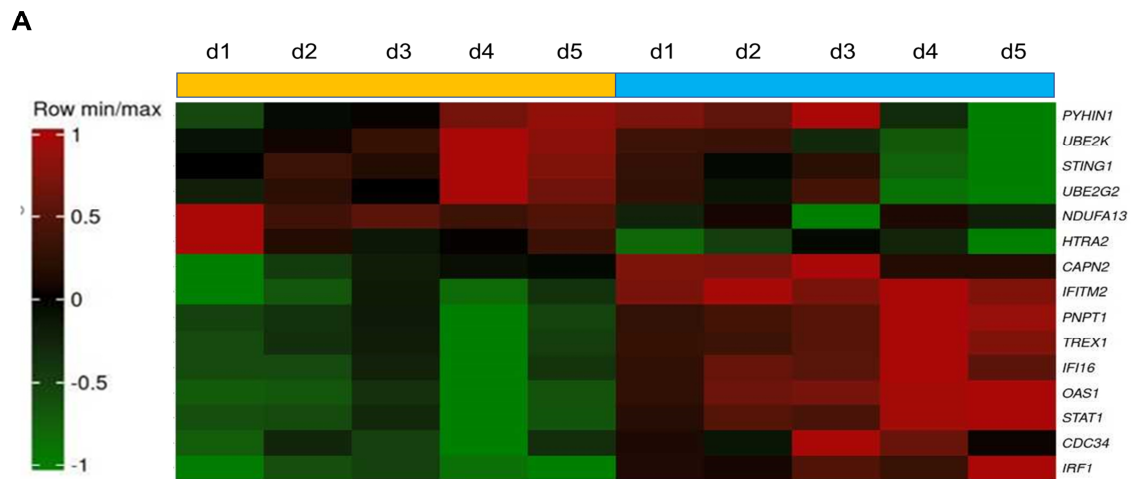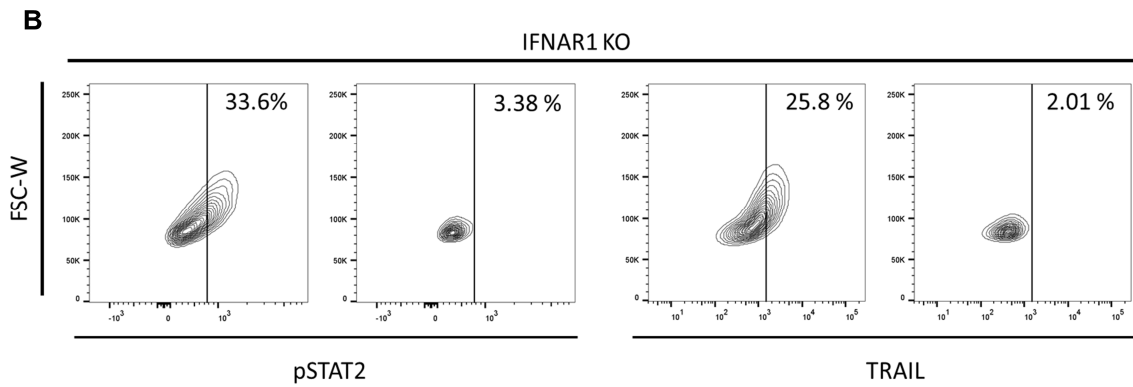

**Supplementary Fig. 6.** (A) Heatmap showing the expression of IFN- $\beta$ -associated genes by peripheral healthy donor NK cells in co-culture with non-infected (yellow) or HDV-infected (blue) HepG2-hNTCP cells (d: donor) (n=5). (B) Contour plot for the expression of pSTAT2 and TRAIL by transfected (Atto-550<sup>+</sup>) Mock or IFNAR1 KO NK cells after 24 h of stimulation with IFN- $\beta$  (100 ng/ml).
